# Supplementary material for: Pollution Characteristics and Human Health Risk Assessment of Heavy Metals in Street Dust from a Typical Industrial Zone in Wuhan City, Central China
Source: MDPI journal article supplement (doi:10.3390/ijerph191710970), 2022-09-02
Supplement: s1 [file s1]

# **Supplemental Materials (SM) to**

## **Status, sources, and human health risk assessment of heavy metals in street dust from a typical industrial zone of Wuhan City**

Hong Chen<sup>1,2,3</sup>, Changlin Zhan<sup>1,2,4\*</sup>, Shan Liu<sup>1,2</sup>, Jiaquan Zhang<sup>1,2</sup>, Hongxia Liu<sup>1,2</sup>,

Ziguo Liu<sup>1,2</sup>, Ting Liu<sup>1,2</sup>, Xianli Liu<sup>1,2</sup>, Wensheng Xiao<sup>1,2</sup>

(1. School of Environmental Science and Engineering, Hubei Polytechnic University, Huangshi, 435003, China;

2. Hubei Key Laboratory of Mine Environmental Pollution Control and Remediation, Hubei Polytechnic University, Huangshi, 435003, China;

3. College of Environment, Zhejiang University of Technology, Hangzhou, 310014

4. State Key Laboratory of Loess and Quaternary Geology, Institute of Earth Environment, Chinese Academy of Sciences, Xi'an 710061, China)

**Corresponding author:** zhanchanglin@hbpu.edu.cn (C.L. Zhan)

**Table S1 Classification criteria of potential ecological risks**

| Single element potential ecological risk coefficient ( $E_p^i$ ) |                                    | Comprehensive potential ecological risk index ( $RI$ ) |                               |
|------------------------------------------------------------------|------------------------------------|--------------------------------------------------------|-------------------------------|
| ≤30                                                              | Minor ecological hazard            | ≤80                                                    | Minor ecological hazard       |
| 30~60                                                            | Medium ecological hazard           | 80~160                                                 | Medium ecological hazard      |
| 60~120                                                           | Strong ecological hazard           | 160~320                                                | Strong ecological hazard      |
| 120~240                                                          | Very strong ecological hazard      | ≥320                                                   | Very strong ecological hazard |
| ≥240                                                             | Extremely strong ecological hazard |                                                        |                               |

**Table S2 Parameter values in average daily dose calculation models of heavy metals**

| Parameter | Physical meaning and unit                               | Value                                               |                      |
|-----------|---------------------------------------------------------|-----------------------------------------------------|----------------------|
|           |                                                         | adult                                               | Child                |
| C         | Heavy metal content (mg/kg)                             | 95%UCL                                              | 95%UCL               |
| IngR      | Frequency of manual-oral intake (mg/d)                  | 100                                                 | 200                  |
| InhR      | Respiratory intake frequency (m <sup>3</sup> /d)        | 12.8                                                | 7.63                 |
| CF        | Unit conversion (kg/mg)                                 | 1×10 <sup>-6</sup>                                  | 1×10 <sup>-6</sup>   |
| EF        | Exposure frequency (d/a)                                | 350                                                 | 350                  |
| ED        | Exposure duration (a)                                   | 24                                                  | 6                    |
| SA        | Exposed skin area (cm <sup>2</sup> )                    | 1701                                                | 899                  |
| SL        | Adhesion coefficient of skin (mg/(cm·d) <sup>-1</sup> ) | 0.07                                                | 0.2                  |
| ABS       | Skin absorption factor                                  | 0.001                                               | 0.001                |
| PEF       | Particulate emission factor (m <sup>3</sup> /kg)        | 1.32×10 <sup>9</sup>                                | 1.32×10 <sup>9</sup> |
| BW        | middleweight (kg)                                       | 56.8                                                | 15.9                 |
| AT        | Mean total exposure time (d)                            | Non-carcinogenic: ED×365;<br>carcinogenesis: 70×365 |                      |
